# Supplementary material
Source: publisher site journal article supplement (https://www.dovepress.com/article/438064)
Supplement: Supplementary file 1 [file get_supplementary_file.php]

Supplementary Table 1 Sensitivity analysis of the comparisons of the C-index of FIGO staging and new staging

| Staging systems | C-index (95%CI)     |
|-----------------|---------------------|
| FIGO staging    | 0.744 (0.737-0.751) |
| New staging     | 0.750 (0.742-0.757) |

FIGO: the International Federation of Gynecology and Obstetrics, CI: confidence interval
